# Supplementary material
Source: publisher figshare collection journal article supplement (https://acs.figshare.com/ndownloader/files/4190959)
Supplement: Supplementary file 1 [file 4190959]

Polymeric optodes based on upconverting nanorods for  
fluorescent measurements of pH and metal ions in blood  
samples

*Liangxia Xie, Yu Qin\* and Hong-Yuan Chen*

State Key Laboratory of Analytical Chemistry for Life science, School of Chemistry  
and Chemical Engineering, Nanjing University, Nanjing, 210093, China.

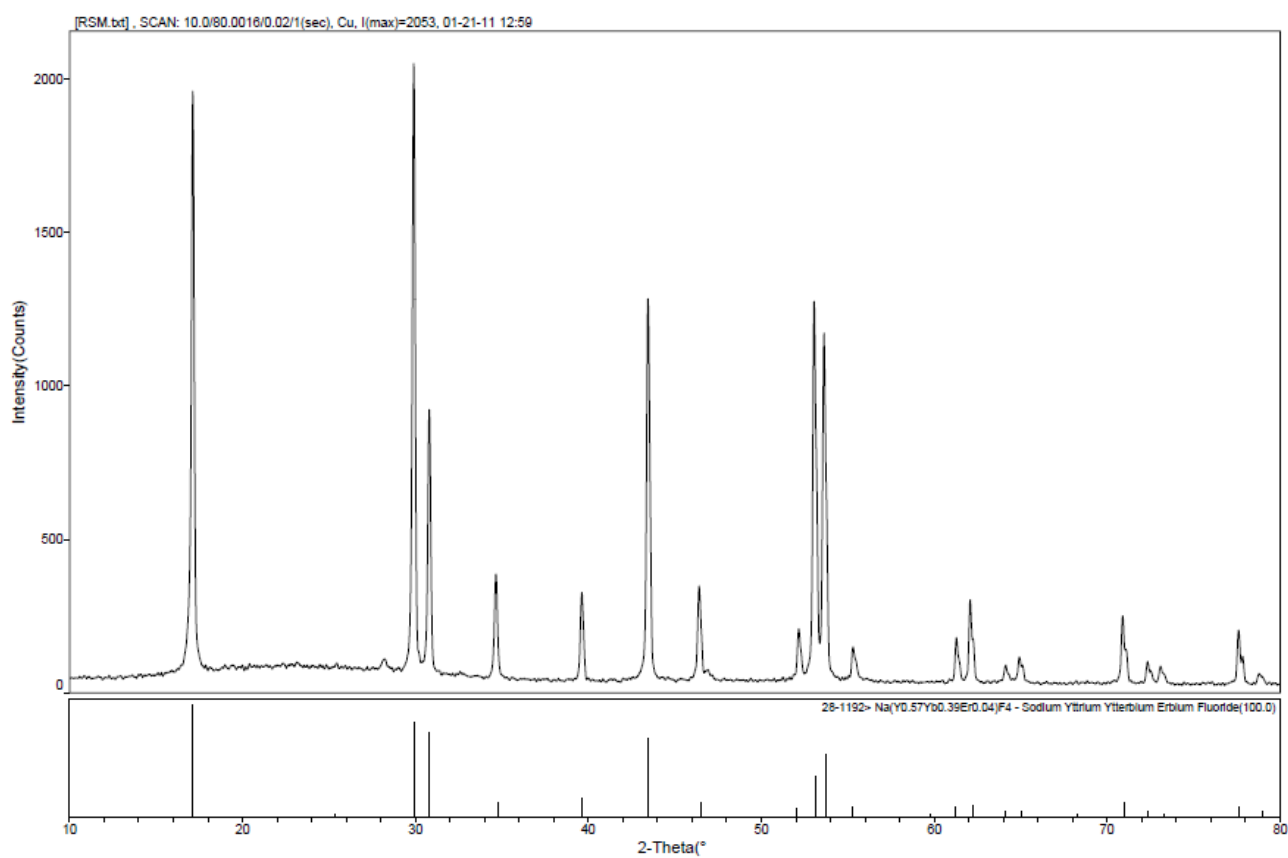

**Figure S1.** Experimental powder X-ray diffraction (XRD) pattern (top curve) and the calculated line pattern for hexagonal NaYF<sub>4</sub>: Er, Yb (JCPDS No. 28-1192, bottom curve)

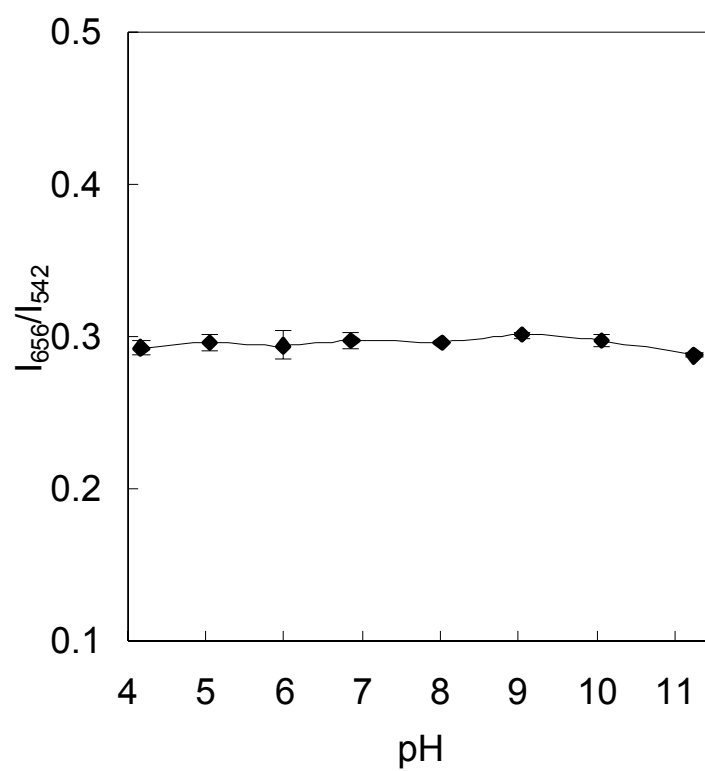

**Figure S2.** Upconversion luminescence intensity ratio of peak 656 nm to peak 542 nm of the optode without ETH 5418

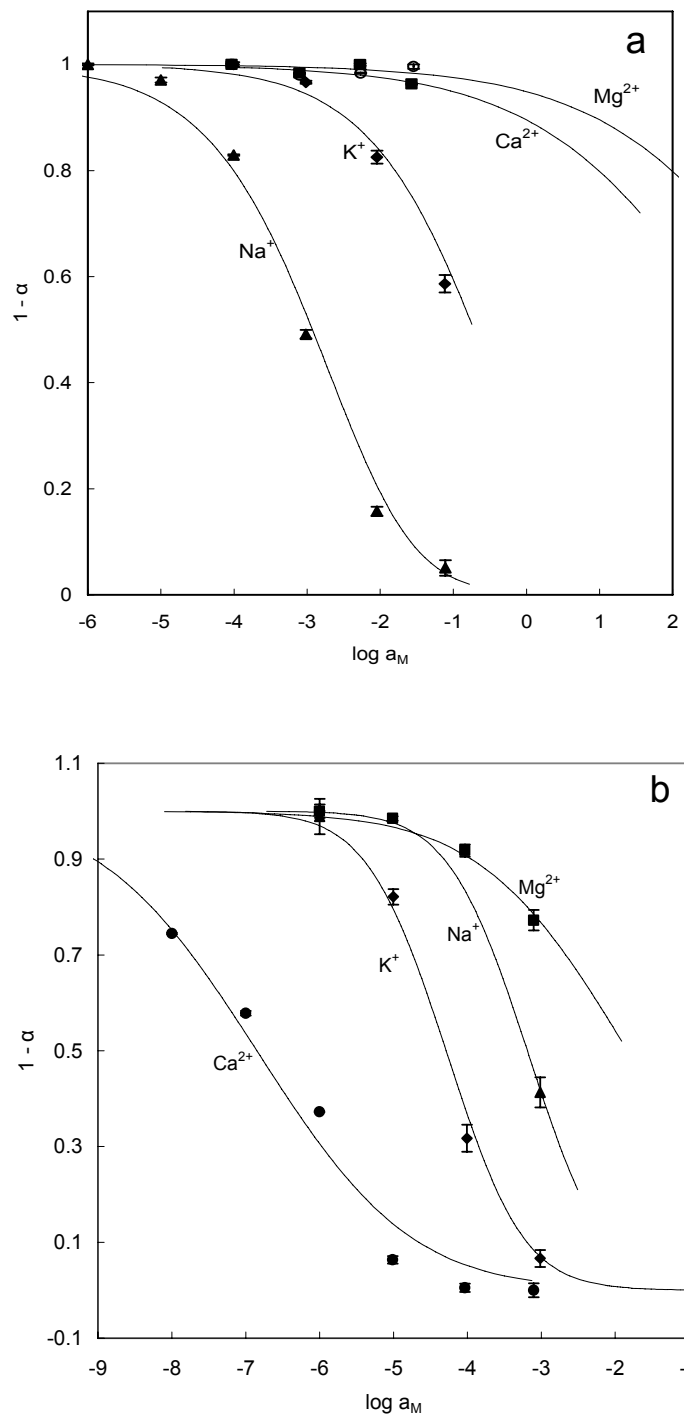

**Figure. S3.** Response of the upconverting nanorods based (a)  $\text{Na}^+$ -selective and (b)  $\text{Ca}^{2+}$ -selective optode to various sample ions buffered by 0.01M Gly-HCl solution (pH 4.8).  $\alpha$  is the deprotonation degree of ETH 5418.

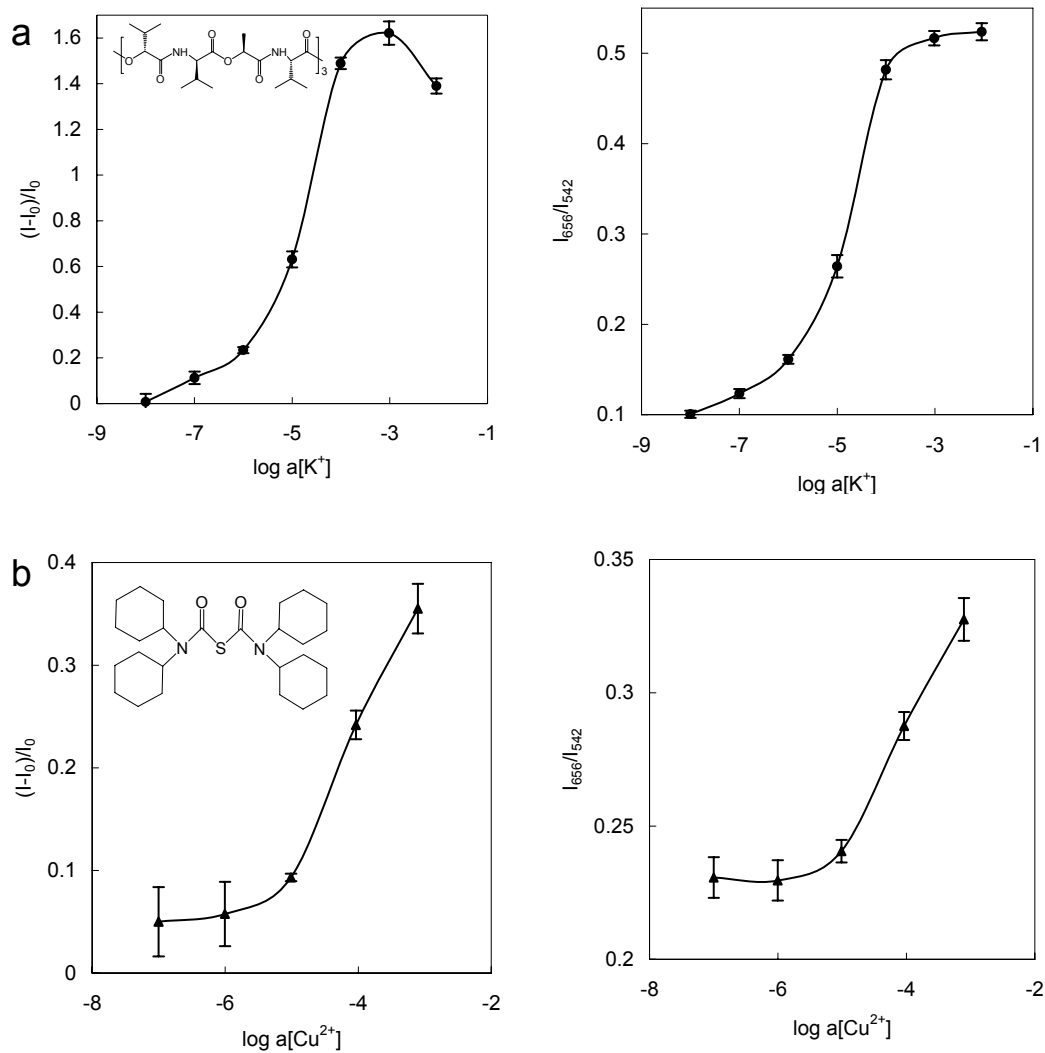

**Figure. S4.** Response curves of upconverting nanorods based (a) membrane with valinomycin toward  $K^+$  and (b) membrane with  $N,N,N',N'$ -tetracyclohexyl-3-thiaglutaric diamide toward  $Cu^{2+}$ , by monitoring the luminescent intensity at 656 nm (left column), and the ratio of peak 656 nm to peak 542 nm (right column).  $I_0$  is the intensity of the membrane in a pH 4.8 gly-HCl buffer solution only.
